# Supplementary material for: Evaluation of a SARS-CoV-2 spike protein ectodomain subunit vaccine with a squalene emulsion adjuvant in rodents and rhesus macaques
Source: PubMed Central journal article supplement — Hum Vaccin Immunother. 2023 Oct 26;19(2):2258571. doi: 10.1080/21645515.2023.2258571 (PMC10760503; doi:10.1080/21645515.2023.2258571), 2023-10-26
Supplement: KHVI_A_2258571_SM0909.pdf [file KHVI_A_2258571_SM0909.pdf]

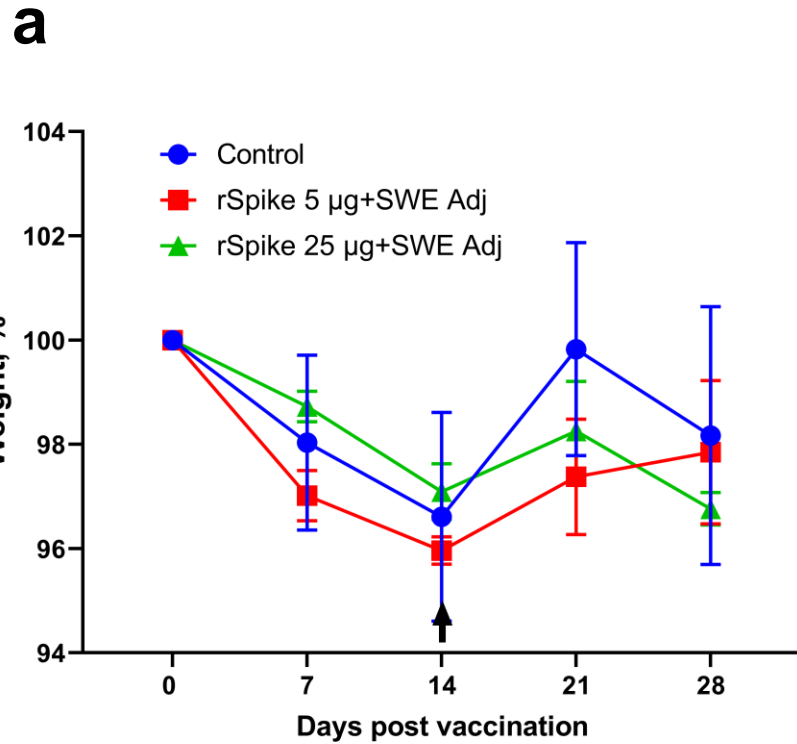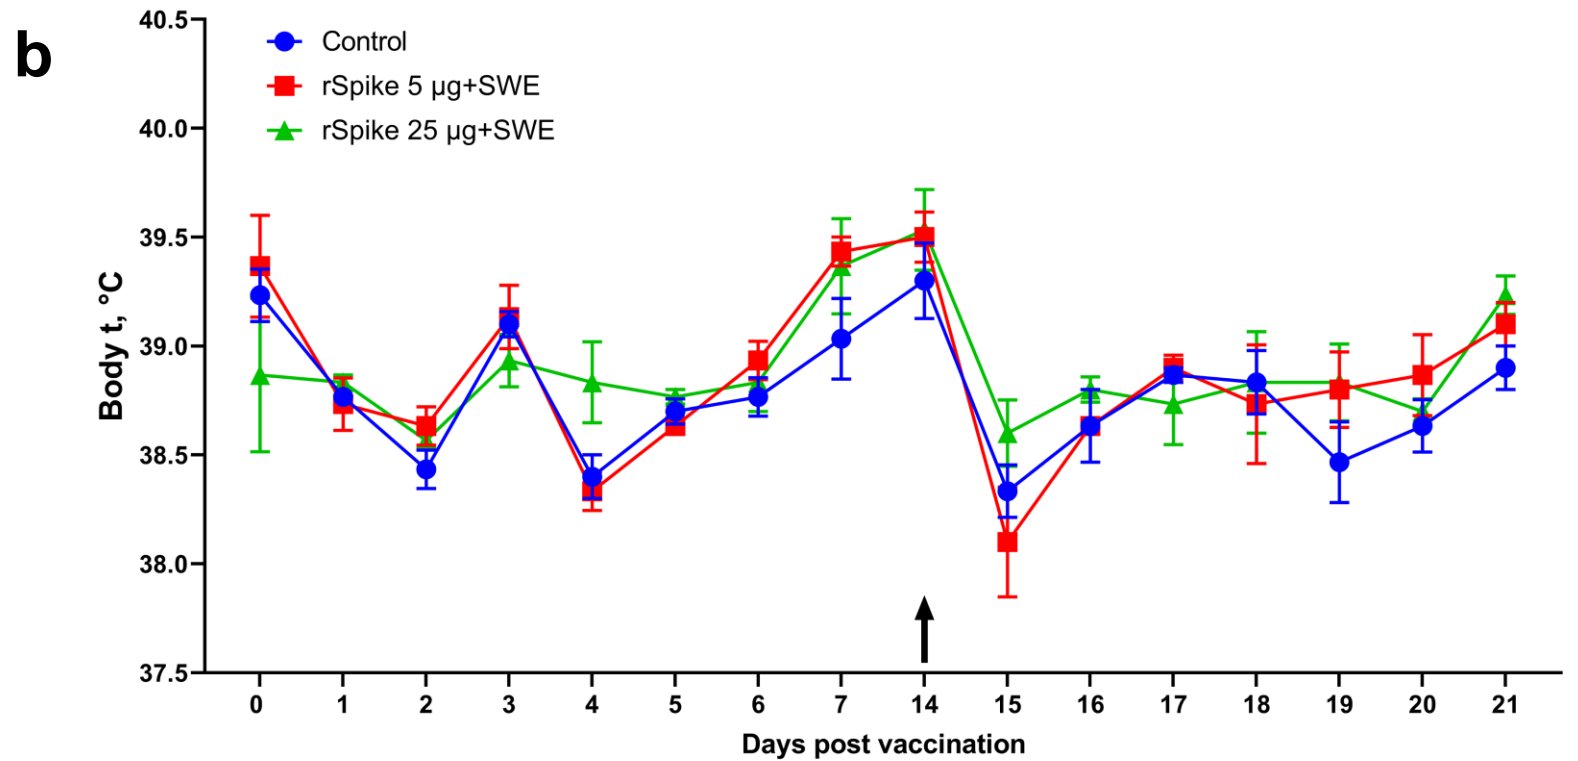

**Supplementary figure 1. Dynamics of weight (a) and body temperature (b) of macaques after vaccination.** On day 14, the booster vaccination was administered (marked with an arrow). Differences in the studied variables between animal groups were assessed using Tukey's multiple comparisons test. There was no difference between the groups in terms of the indicator studied.
