# Supplementary material for: Evaluation of a SARS-CoV-2 spike protein ectodomain subunit vaccine with a squalene emulsion adjuvant in rodents and rhesus macaques
Source: PubMed Central journal article supplement — Hum Vaccin Immunother. 2023 Oct 26;19(2):2258571. doi: 10.1080/21645515.2023.2258571 (PMC10760503; doi:10.1080/21645515.2023.2258571), 2023-10-26

## Supplementary Figure 2. Biochemical blood analysis of macaques after vaccination.

The biochemical blood test included the analysis of the following parameters: glucose oxidase (GLU), alkaline phosphatase (ALP), alanine aminotransferase (ALT), aspartate aminotransferase (AST), lactate dehydrogenase (LDH), total bilirubin (TB), urea nitrogen (BUN), creatinine (CRE), cholesterol (CHOL), triglycerides (TG), total protein (TP), albumin (ALB), globulin (GLB), sodium (Na), and potassium (K). Differences in the studied variables between animal groups were assessed using Tukey's multiple comparisons test. \* $P < 0.05$ , \*\* $P < 0.01$  and \*\*\* $P < 0.001$ . The broken line shows the upper limit of the physiological norm.

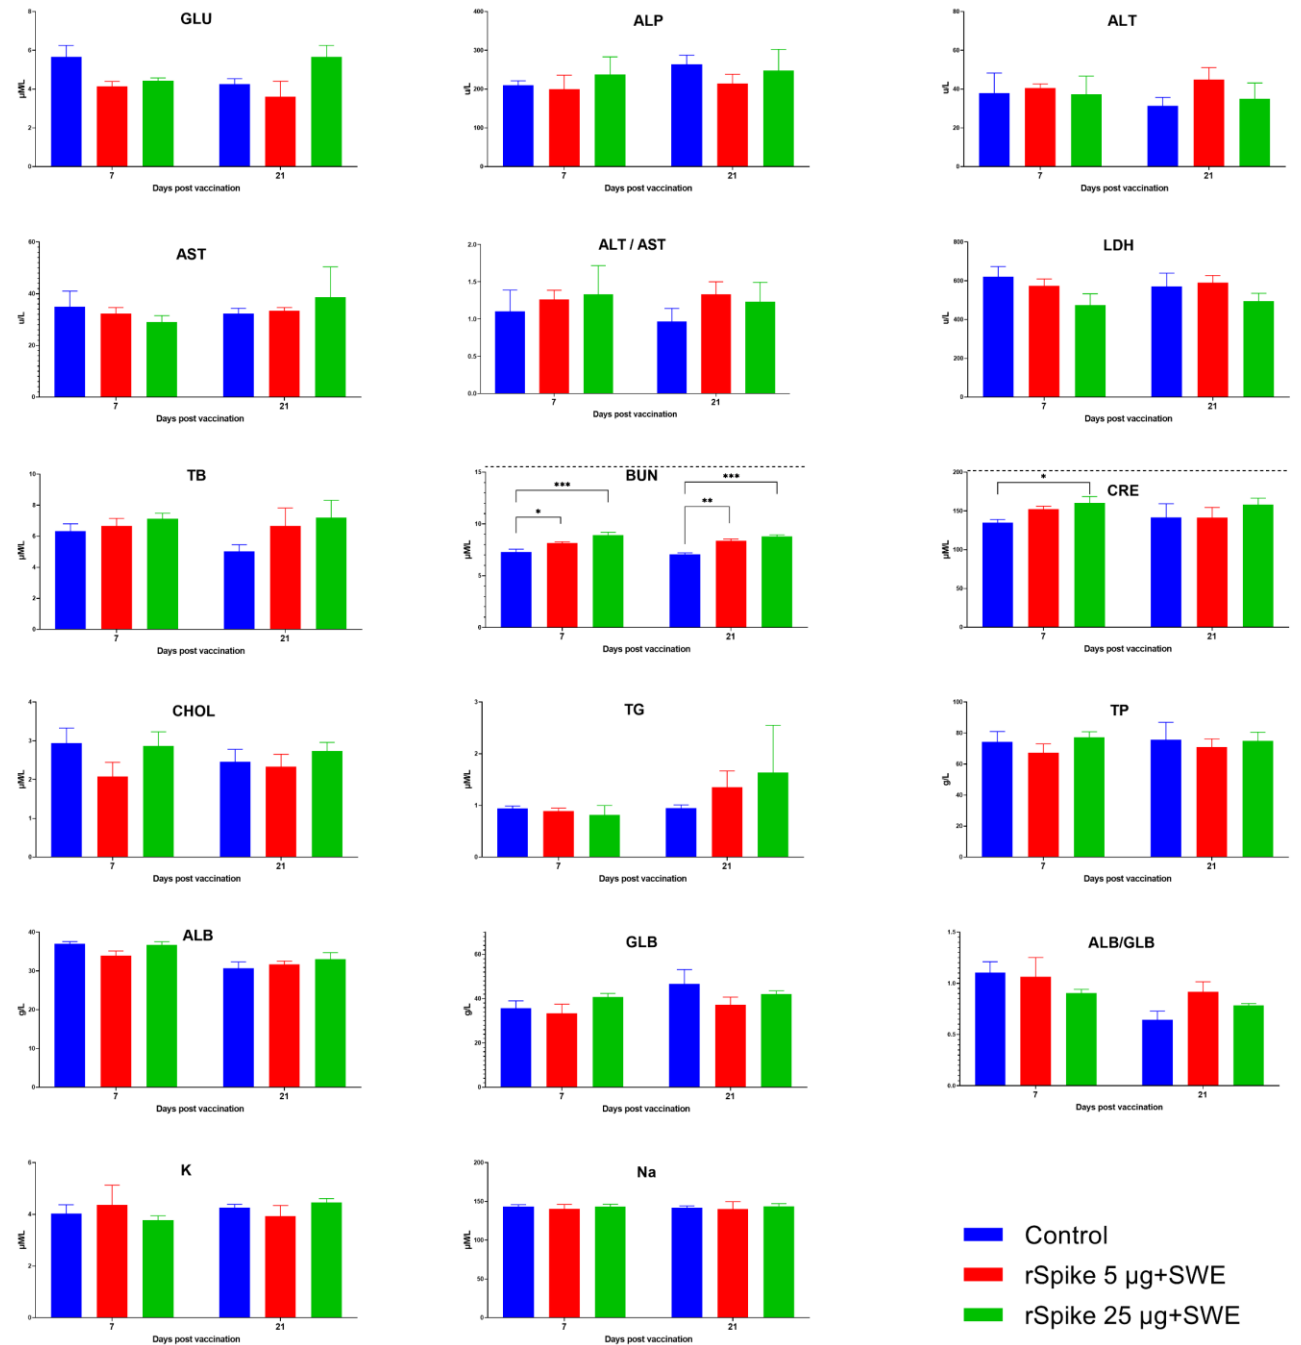

Supplement: KHVI_A_2258571_SM0911.pdf [file KHVI_A_2258571_SM0911.pdf]
