# Supplementary material for: Evaluation of a SARS-CoV-2 spike protein ectodomain subunit vaccine with a squalene emulsion adjuvant in rodents and rhesus macaques
Source: PubMed Central journal article supplement — Hum Vaccin Immunother. 2023 Oct 26;19(2):2258571. doi: 10.1080/21645515.2023.2258571 (PMC10760503; doi:10.1080/21645515.2023.2258571), 2023-10-26

# Supplementary Figure 3. Hematological blood analysis of macaques after vaccination.

Hemoglobin (Hgb), red blood cell (RBC), mean cell volume (MCV), mean cell hemoglobin (MCH), hematocrit (Hct), platelets (Plt), white blood cell (WBC), monocytes (MO), lymphocytes (LY), neutrophils (NE), eosinophils (EO), basophils (BA). Differences in the studied variables between animal groups were assessed using Tukey's multiple comparisons test. There was no difference between the groups in terms of the indicator studied.

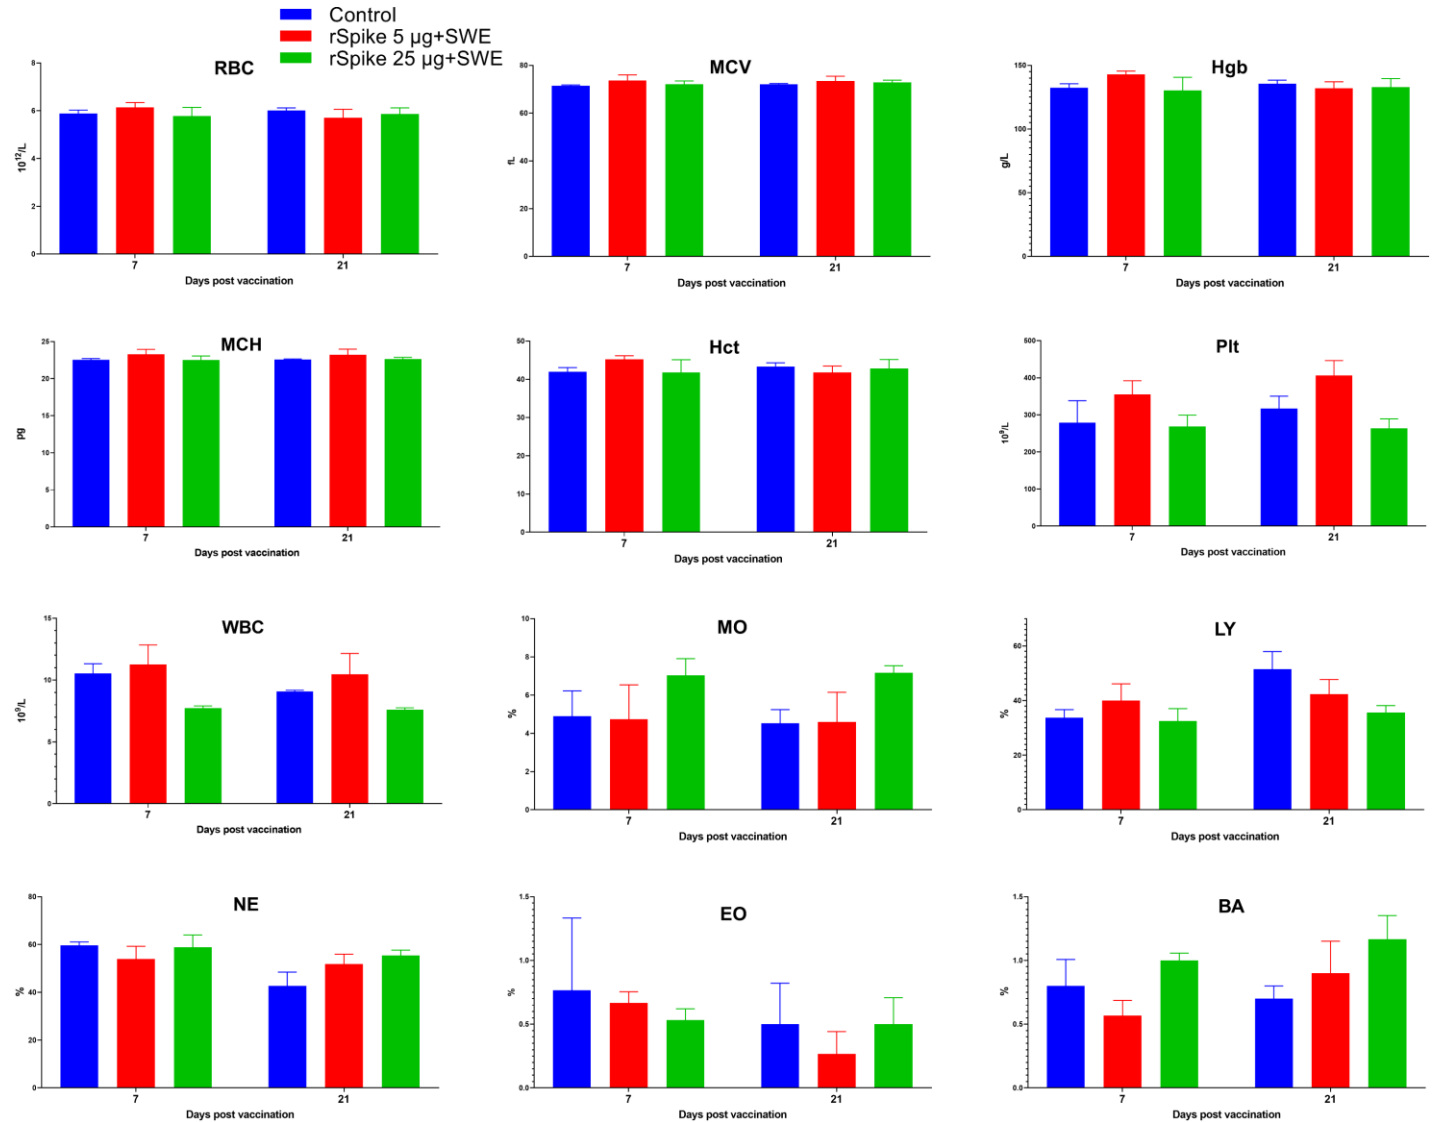

Supplement: KHVI_A_2258571_SM0913.pdf [file KHVI_A_2258571_SM0913.pdf]
